# Supplementary material for: Cation recognition and pseudorotaxane formation of tris-dipyrrin BF2 macrocycles
Source: Royal Society of Chemistry journal article supplement (doi:10.1039/c0cc01717e), 2010-01-01
Supplement: c0cc01717e.pdf [file c0cc01717e.pdf]

## Supplementary information

### **Cation recognition and pseudorotaxane formation of tris-dipyrrin BF<sub>2</sub> macrocycles**

Naoya Sakamoto, Chusaku Ikeda, and Tatsuya Nabeshima\*

*Graduate School of Pure and Applied Sciences, University of Tsukuba, Tsukuba, Ibaraki, 305-8571, Japan*

#### **Contents**

1. General
2. Synthesis of **1** and **2**
3. Absorption spectral changes of **1** upon addition of K<sup>+</sup> and Rb<sup>+</sup>
4. Absorption spectral changes of **2** upon addition of K<sup>+</sup>, Rb<sup>+</sup>, and Cs<sup>+</sup>
5. Absorption spectral changes of **2** upon addition of **3**
6. <sup>1</sup>H NMR spectral changes of **2** upon addition of Cs<sup>+</sup>
7. <sup>19</sup>F NMR spectral change of **1** upon addition of Cs<sup>+</sup>
8. <sup>11</sup>B NMR spectral change of **1** upon addition of Cs<sup>+</sup>
9. <sup>1</sup>H NMR spectral change of **2** upon addition of **3**
10. <sup>1</sup>H NMR spectra of **2+3** at low temperature
11. Fluorescence spectral changes of **2** upon addition of **3**
12. Geometry optimized structures of **1** and **2**
13. Electrostatic potential surface of **1**, **2**, and tetramethyl-BODIPY
14. NMR spectra of **1** and **2**

## 1. General

All chemicals were reagent grade, and used without further purification. All reactions were performed under nitrogen atmosphere. Tris-dipyrrin macrocycles were prepared as previously described. Column chromatography was performed with Kanto Chemical silica gel 60 N (spherical, neutral) or Wako Chemical alumina (activated, about 200 mesh).  $^1\text{H}$  NMR spectra were recorded on a Bruker ARX400 spectrometer at 400 MHz, or a Bruker AC300 spectrometer at 300 MHz.  $^{13}\text{C}$  NMR spectra were recorded on a Bruker ARX400 spectrometer at 100 MHz. In both NMR measurements, tetramethylsilane was used as an internal standard (0 ppm).  $^{11}\text{B}$  NMR spectra were recorded on a Bruker ARX400 spectrometer at 128 MHz, boron trifluoride-diethyl etherate was used as an internal standard (0 ppm).  $^{19}\text{F}$  NMR spectra were recorded on a Bruker AVANCE500 spectrometer at 470 MHz, hexafluorobenzene was used as an internal standard (-162 ppm). UV-Vis spectra were recorded on JASCO V-660 spectrophotometer. Fluorescence spectra and absolute quantum yields were measured on a Hitachi F-4500 spectrometer and a Hamamatsu Photonics absolute PL quantum yield measurement system C9920-02, respectively. Mass spectra (ESI-TOF, positive mode) were recorded on an Applied Biosystems QStar Pulsar *i* spectrometer. Elemental analyses were performed at Chemical Analysis Center, University of Tsukuba. Geometry optimizations and surface potential calculations were performed with Spartan08 programs.<sup>1</sup> X-ray crystallographic analysis: Intensities of reflections were collected on a Rigaku Mercury CCD diffractometer with a graphite monochromated Mo-K $\alpha$  radiation ( $\lambda = 0.71070$ ) using CrystalClear (Rigaku Corp.). The structure was solved by direct methods. The structure refinement was performed with SHELXL-97.

## 2. Synthesis of 1 and 2

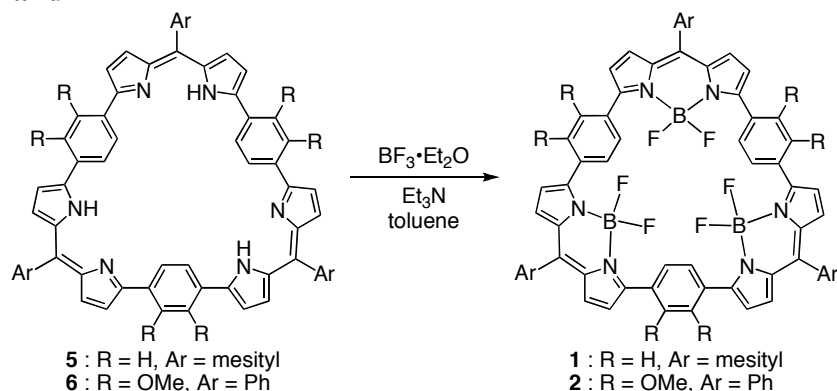

**1:** To a stirred solution containing **5** (14.94 mg, 0.015 mmol) and triethylamine (0.5 mL, 3.6 mmol) in toluene (30 mL) was added boron trifluoride-diethyl etherate (0.5 mL, 4.0 mmol). After stirred for 48 h at 80 °C, the reaction mixture was washed with water (2 × 30 mL). The organic phase was dried over Na<sub>2</sub>SO<sub>4</sub>, filtered, evaporated to dryness. The obtained residue was purified by column chromatography on silica gel using chloroform as the eluent, and recrystallized from CH<sub>2</sub>Cl<sub>2</sub>/hexane to give **1** (5.0 mg, >29%).

green powder, <sup>1</sup>H NMR (400 MHz, CDCl<sub>3</sub>) δ 2.22 (s, 18H), 2.36 (s, 9H), 6.44 (d, *J* = 4.4 Hz, 6H), 6.47 (d, *J* = 4.4 Hz, 6H), 6.95 (s, 6H), 8.38 (s, 12H). <sup>13</sup>C NMR (100 MHz, CDCl<sub>3</sub>) δ 20.1, 21.1, 121.7, 128.1, 129.0, 130.1, 130.3, 133.7, 136.8, 137.8, 138.5, 143.5, 158.1. MS(MALDI-TOF) observed *m/z* 1153.08 ([M+H]<sup>+</sup>), calcd for C<sub>72</sub>H<sub>58</sub>B<sub>3</sub>F<sub>6</sub>N<sub>6</sub> *m/z* 1153.49. Anal. Calcd for C<sub>72</sub>H<sub>57</sub>B<sub>3</sub>F<sub>6</sub>N<sub>6</sub>•2H<sub>2</sub>O: C, 72.75; H, 5.17; N, 7.07. Found: C, 72.54; H, 5.18; N, 6.82.

**2:** To a stirred solution containing **6** (40.3 mg, 0.038 mmol) and triethylamine (0.5 mL, 3.6 mmol) in toluene (40 mL) was added boron trifluoride-diethyl etherate (0.5 mL, 4.0 mmol). After stirred for 10h at 80 °C, the reaction mixture was added water (80 mL) and the organic layer separated. The aqueous phase was extracted with dichloromethane (3 × 80 mL). The combined organic phase was dried over Na<sub>2</sub>SO<sub>4</sub>, filtered, evaporated to dryness. The obtained residue was purified by column chromatography on silica gel using dichloromethane as the eluent, and recrystallized from CH<sub>2</sub>Cl<sub>2</sub>/hexane to give **2** (45.3 mg, >99%).

Green powder, mp > 300 °C. <sup>1</sup>H NMR (400 MHz, CDCl<sub>3</sub>) δ 3.80 (s, 18H), 6.67 (d, *J* = 4.0 Hz, 6H), 6.88 (d, *J* = 4.0 Hz, 6H), 7.50-7.65 (m, 15H), 7.84 (s, 6H). <sup>13</sup>C NMR (100 MHz, CDCl<sub>3</sub>) δ 62.3, 123.2, 126.3, 128.3, 128.5, 130.0, 130.1, 130.6, 134.4, 136.1, 143.6, 152.0, 154.6. MS(ESI) observed *m/z* 1229.42 ([M+Na]<sup>+</sup>), calcd for C<sub>69</sub>H<sub>51</sub>B<sub>3</sub>F<sub>6</sub>N<sub>6</sub>NaO<sub>6</sub> *m/z* 1229.40. Anal. Calcd for C<sub>69</sub>H<sub>51</sub>B<sub>3</sub>F<sub>6</sub>N<sub>6</sub>O<sub>6</sub>•1.5H<sub>2</sub>O•1/4C<sub>6</sub>H<sub>14</sub>: C, 67.46; H, 4.62; N, 6.70. Found: C, 67.58; H, 4.70; N, 6.32.

### 3. Absorption spectral changes of **1** upon addition of $K^+$ and $Rb^+$

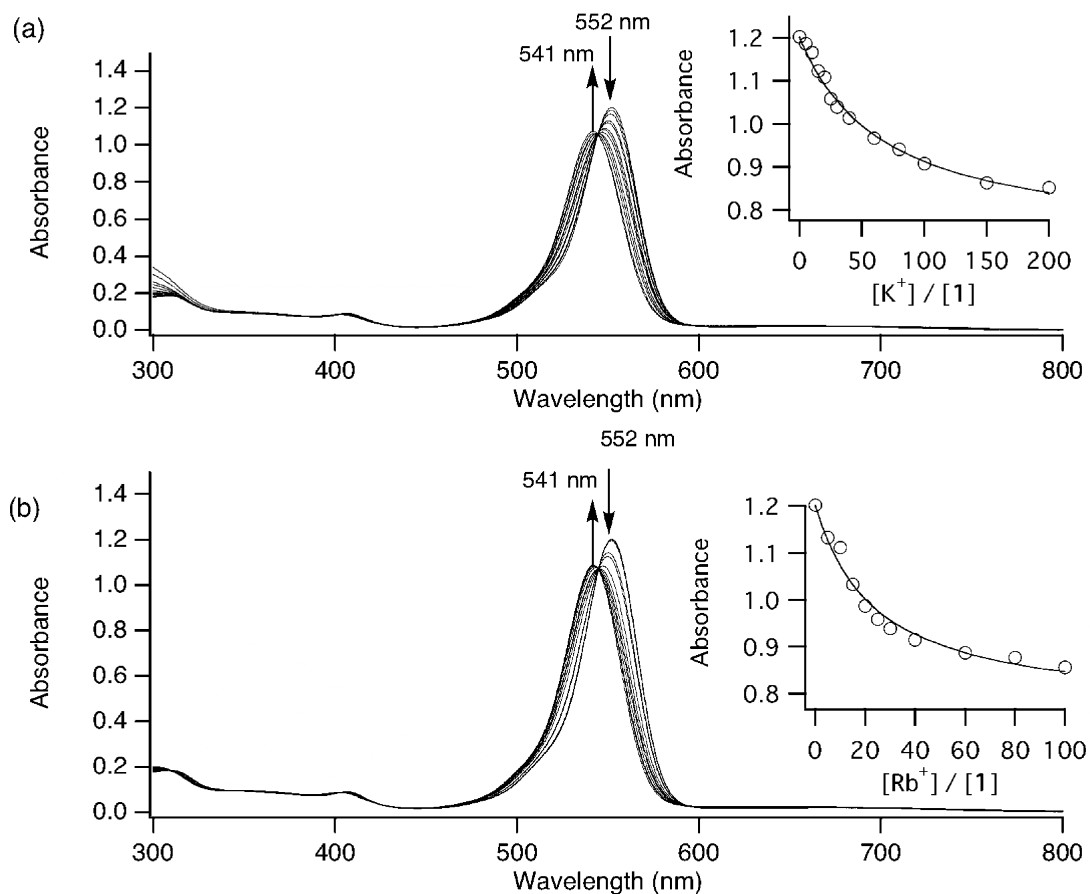

**Figure S1.** Absorption spectral changes of **1** (4.0  $\mu$ M) upon addition of (a) KTFPB (0–0.8 mM) and (b) RbTFPB (0–0.4 mM) in  $CHCl_3$ - $CH_3OH$  (10:1). Inset shows the binding isotherm at 552 nm analyzed by a nonlinear least-square regression (calculated lines are shown in solid lines).

#### 4. Absorption spectral changes of **2** upon addition of $K^+$ , $Rb^+$ , and $Cs^+$

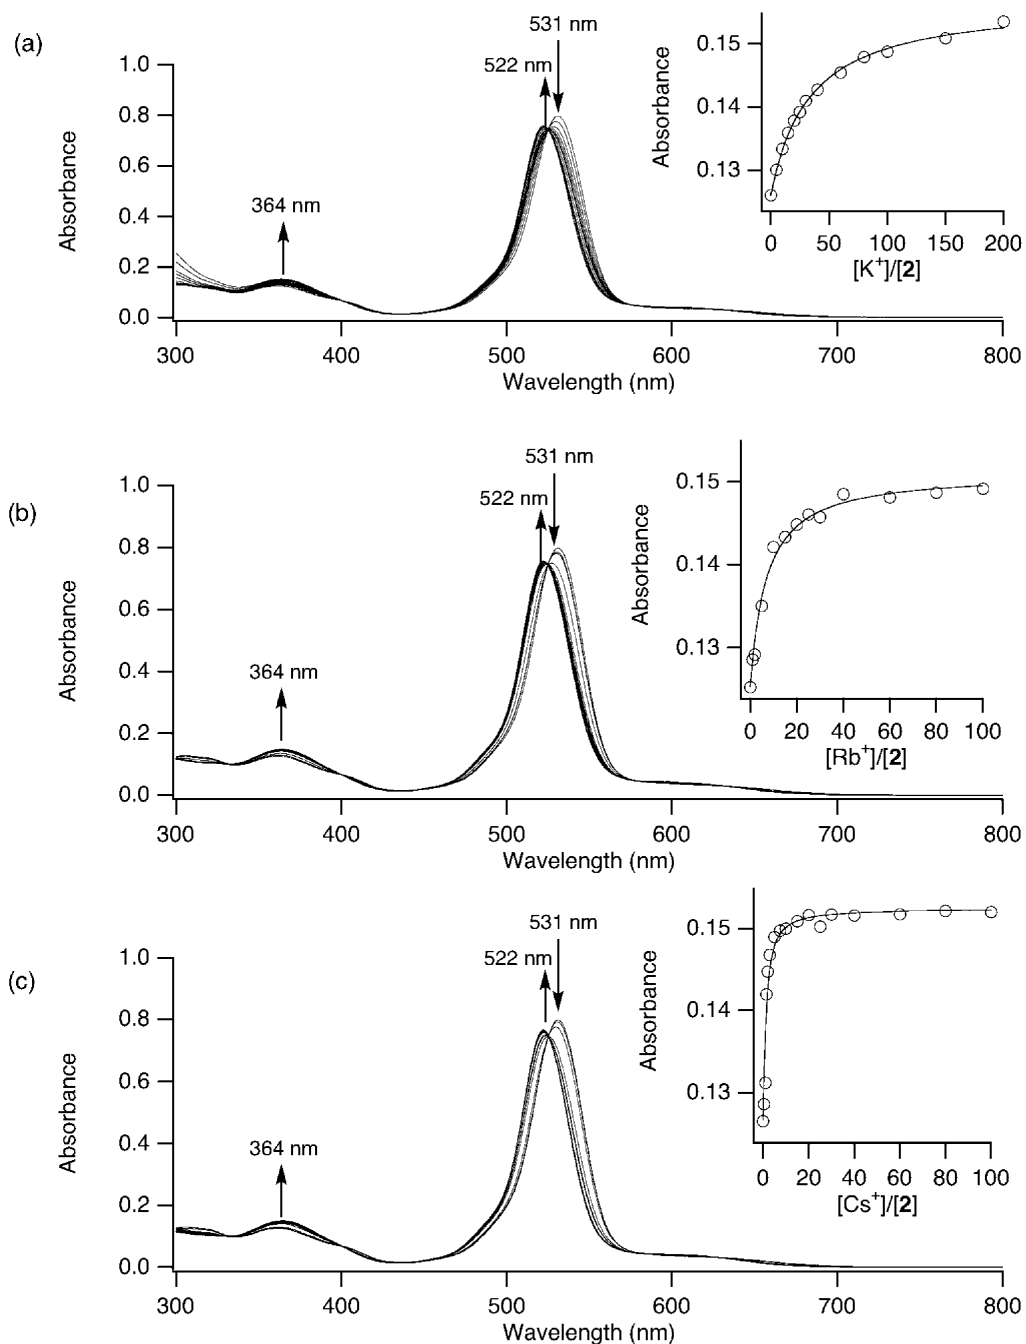

**Figure S2.** Absorption spectral changes of **2** upon (a)  $K^+$ , (b)  $Rb^+$ , and (c)  $Cs^+$  in  $CHCl_3-CH_3OH$  (10:1). Inset shows the binding isotherm at 364 nm analyzed by a nonlinear least-square regression (calculated lines are shown in solid lines).

### 5. Absorption spectral changes of **2** upon addition of **3**.

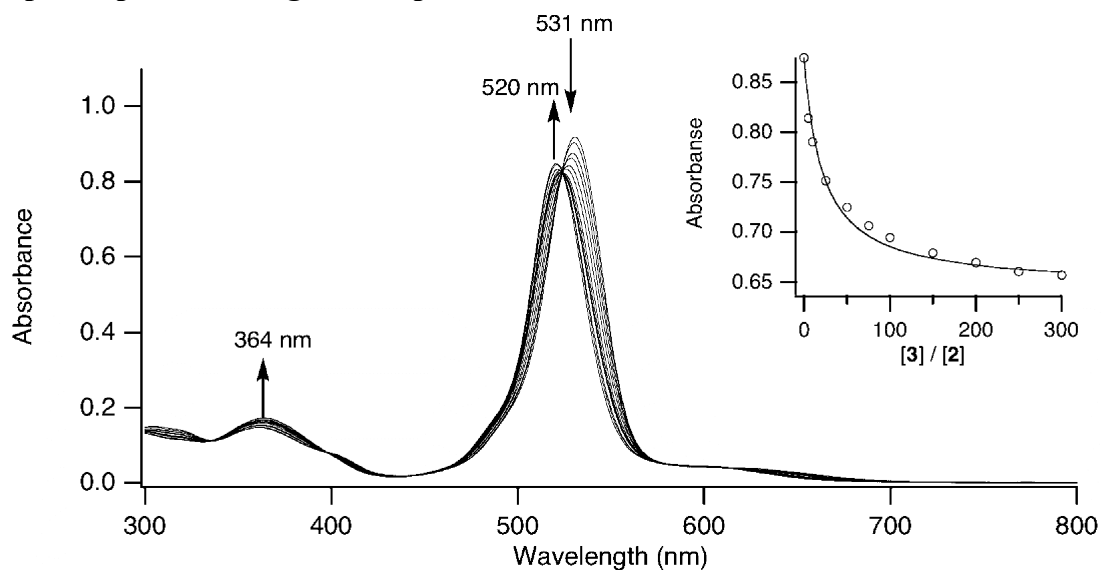

**Figure S3.** Absorption spectral changes of **2** upon **3** in  $\text{CHCl}_3\text{-CH}_3\text{OH}$  (10:1). Inset shows the binding isotherm at 531 nm analyzed by a nonlinear least-square regression (calculated lines are shown in solid lines).

### 6. $^1\text{H}$ NMR spectral changes of **2** upon addition of $\text{Cs}^+$ .

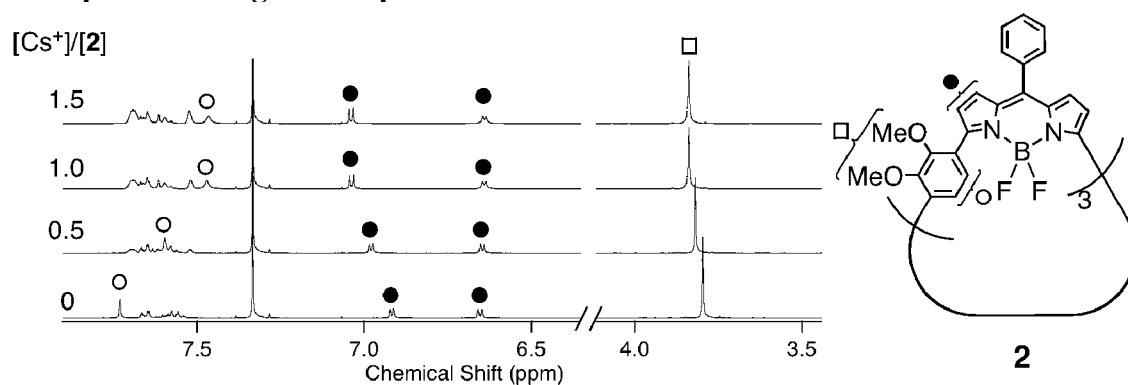

**Figure S4.**  $^1\text{H}$  NMR spectral changes of **2** (1 mM) upon addition of  $\text{CsTFPB}$  in  $\text{CDCl}_3\text{-CD}_3\text{OD}$  (10:1).

7.  $^{19}\text{F}$  NMR spectral change of **1** upon addition of  $\text{Cs}^+$ .

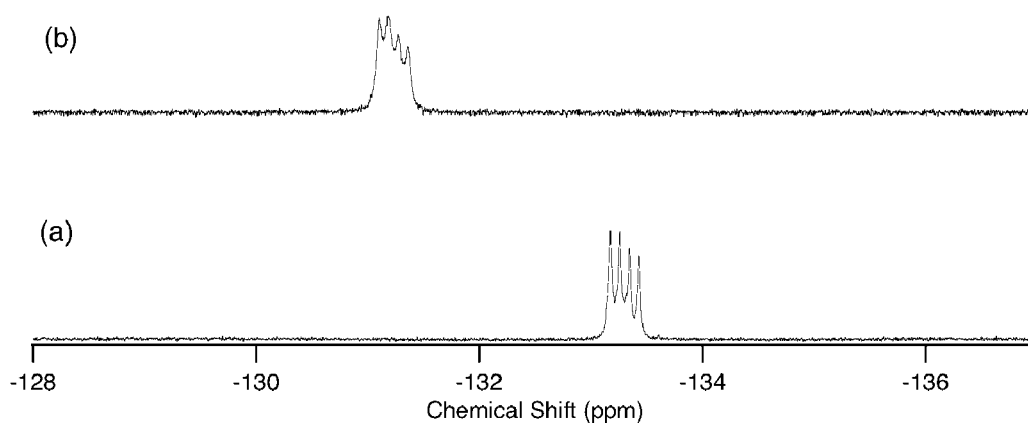

**Figure S5.**  $^{19}\text{F}$  NMR spectra of **1** (0.5 mM) in the (a) absence and (b) presence of CsTFPB (2.5 mM) in  $\text{CDCl}_3\text{-CD}_3\text{OD}$  (10:1).

8.  $^{11}\text{B}$  NMR spectral change of **1** upon addition of  $\text{Cs}^+$ .

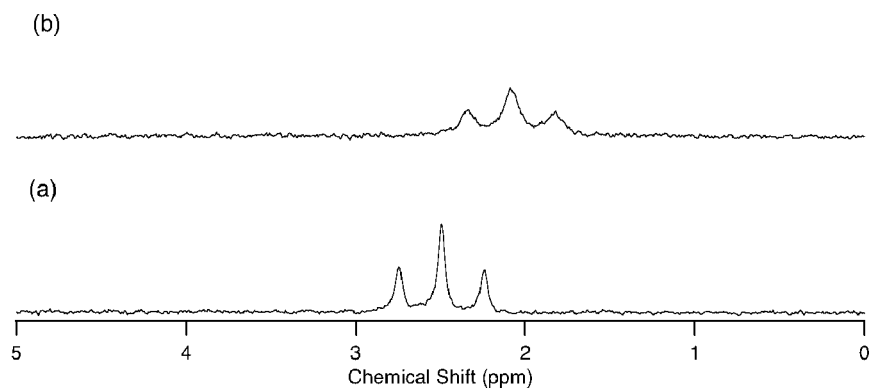

**Figure S6.**  $^{11}\text{B}$  NMR spectra of **1** (0.5 mM) in the (a) absence and (b) presence of CsTFPB (2.5 mM) in  $\text{CDCl}_3\text{-CD}_3\text{OD}$  (10:1).

9.  $^1\text{H}$  NMR spectral change of **2** upon addition of **3**.

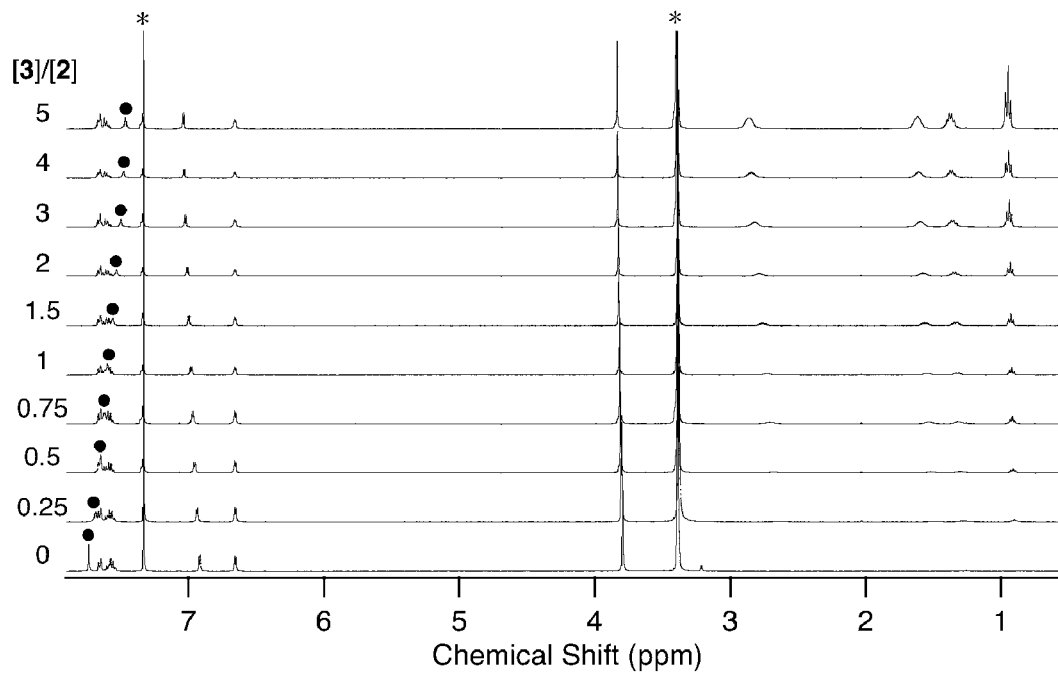

**Figure S7.**  $^1\text{H}$  NMR spectral changes of **2** (1.0 mM) upon addition of **3** in  $\text{CDCl}_3$ - $\text{CD}_3\text{OD}$  (10:1). Asterisk denotes the residual solvent peaks. Phenylene protons are indicated with filled circles.



## 10. $^1\text{H}$ NMR spectra of 2+3 at low temperature

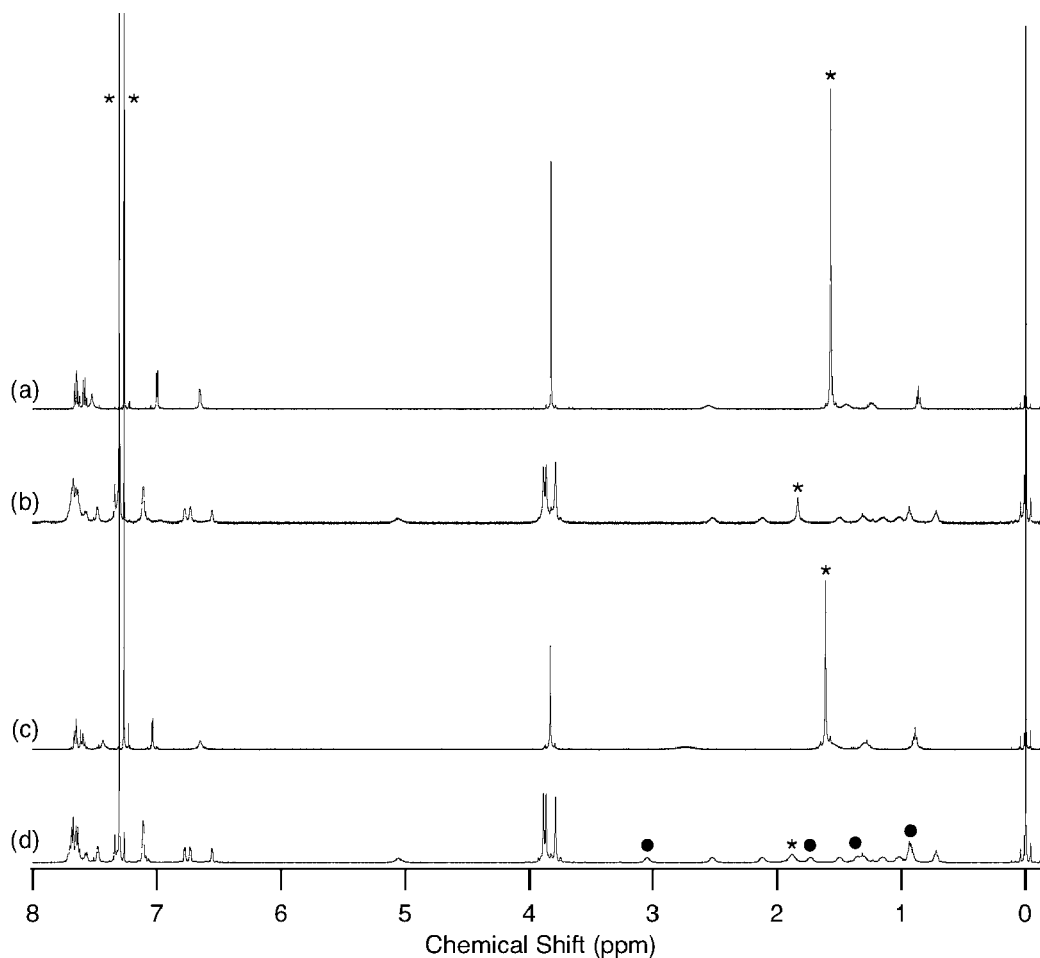

**Figure S8.**  $^1\text{H}$  NMR spectra of **2** in the presence of (a), (b) 1 equiv or (c), (d) 2 equiv of **3** in  $\text{CDCl}_3$  recorded at (a), (c) 298 K and (b), (d) 218 K. Filled circles in (d) denotes the free **3**. Asterisks denotes the solvent peaks and residual  $\text{H}_2\text{O}$ .

### 11. Fluorescence spectral changes of **2** upon addition of **3**

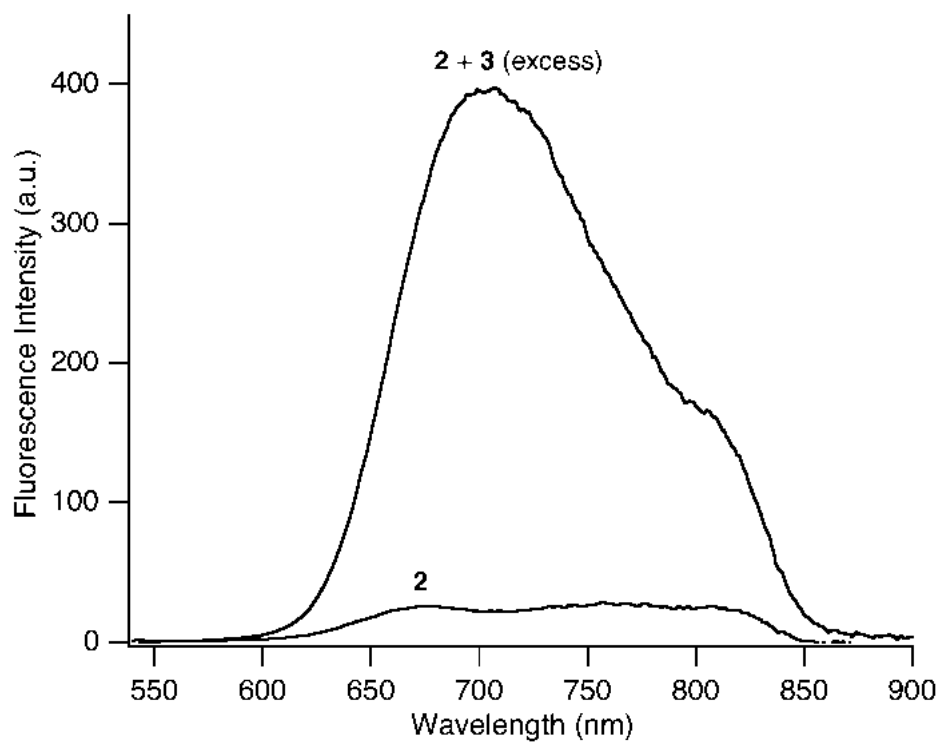

**Figure S9.** Fluorescence spectra of **2** in  $\text{CHCl}_3\text{-CH}_3\text{OH}$  (10:1).

## 12. Geometry optimized structures of 1 and 2

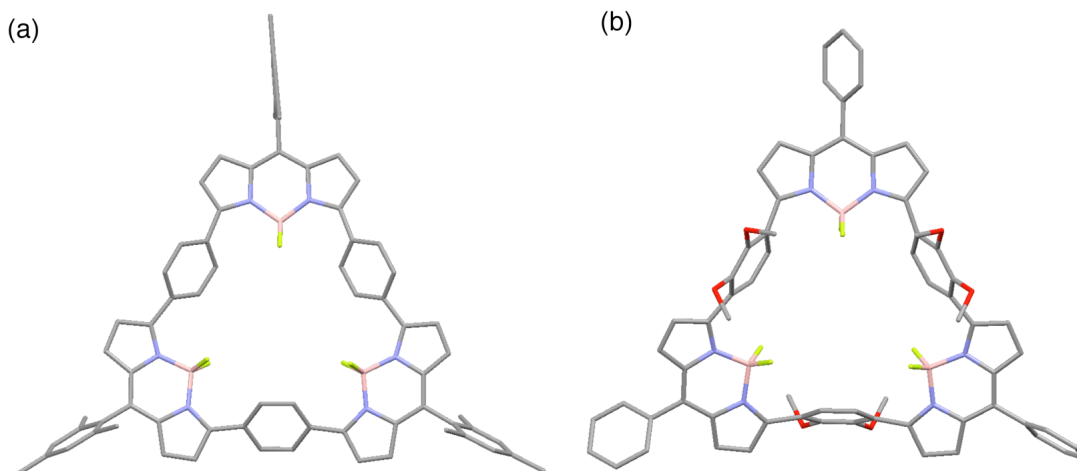

**Figure S10.** Geometry optimized structure of (a) **1** and (b) **2** by DFT calculation at the B3LYP/6-31G\* level. Hydrogen atoms were omitted for clarity.

### Geometries (Z matrices) of **1**

|    |     |             |              |              |
|----|-----|-------------|--------------|--------------|
| 1  | C1  | 1.41714661  | -5.208704801 | -0.135657823 |
| 2  | C2  | 1.629210412 | -6.601694667 | -0.174692851 |
| 3  | H3  | 0.963939507 | -7.274868222 | -0.240296268 |
| 4  | C4  | 2.979109892 | -6.797809148 | -0.100374277 |
| 5  | H5  | 3.419410452 | -7.639691206 | -0.084863724 |
| 6  | C6  | 3.597837095 | -5.548064635 | -0.050582301 |
| 7  | C7  | 4.939726378 | -5.240590341 | 0.002713716  |
| 8  | C8  | 5.381604093 | -3.933297732 | 0.065631904  |
| 9  | C9  | 6.693593418 | -3.396988331 | 0.238161821  |
| 10 | H10 | 7.505410245 | -3.889543029 | 0.259297455  |
| 11 | C11 | 6.565003137 | -2.058074016 | 0.364312867  |
| 12 | H12 | 7.282315372 | -1.451958163 | 0.506967755  |
| 13 | C13 | 5.20886374  | -1.699313222 | 0.25507969   |
| 14 | N14 | 2.611337251 | -4.554971544 | -0.057132752 |
| 15 | N15 | 4.4780473   | -2.842301507 | 0.042935113  |
| 16 | B16 | 2.947559462 | -3.057555127 | -0.12887905  |
| 17 | F17 | 2.322888432 | -2.342348463 | 0.905821549  |
| 18 | F18 | 2.510961221 | -2.573588284 | -1.352938138 |
| 19 | C19 | 5.967996547 | -6.333234955 | -0.03330363  |
| 20 | C20 | 6.256452082 | -7.056301603 | 1.119549529  |
| 21 | C21 | 7.164239746 | -8.105645933 | 1.034103849  |
| 22 | H22 | 7.369981024 | -8.607834543 | 1.813611861  |
| 23 | C23 | 7.780725978 | -8.430792194 | -0.180214295 |
| 24 | C24 | 7.477866339 | -7.704338797 | -1.291212217 |
| 25 | H25 | 7.89519152  | -7.930385761 | -2.114397169 |
| 26 | C26 | 6.579246835 | -6.644373788 | -1.261816129 |
| 27 | C27 | 5.632667262 | -6.738642442 | 2.427019079  |
| 28 | H28 | 4.67386304  | -6.939781607 | 2.38889639   |
| 29 | H29 | 5.760473143 | -5.789042305 | 2.627108821  |
| 30 | H30 | 6.051440694 | -7.281774771 | 3.128374574  |
| 31 | C31 | 8.764691315 | -9.596089316 | -0.28162939  |
| 32 | H32 | 8.462926249 | -10.21549133 | -0.978804027 |
| 33 | H33 | 8.803401955 | -10.06405702 | 0.576700523  |
| 34 | H34 | 9.654348624 | -9.252797103 | -0.51029294  |
| 35 | C35 | 6.230515599 | -5.900194504 | -2.503934468 |
| 36 | H36 | 6.668205133 | -6.324402687 | -3.27195768  |
| 37 | H37 | 6.536473299 | -4.972223438 | -2.424523533 |
| 38 | H38 | 5.258998916 | -5.914252649 | -2.630731619 |
| 39 | C39 | 4.699862241 | -0.331895399 | 0.332000569  |
| 40 | C40 | 3.592892518 | 0.156085571  | -0.390771879 |
| 41 | H41 | 3.06553744  | -0.438551174 | -0.910705522 |
| 42 | C42 | 3.281611402 | 1.490136366  | -0.338460277 |
| 43 | H43 | 2.524720255 | 1.80302543   | -0.820717561 |
| 44 | C44 | 4.029546066 | 2.399668409  | 0.390709962  |
| 45 | C45 | 5.105463343 | 1.919322982  | 1.128991522  |
| 46 | H46 | 5.619243244 | 2.520414564  | 1.657623998  |
| 47 | C47 | 5.434608154 | 0.581844535  | 1.104241976  |
| 48 | H48 | 6.171155866 | 0.271355368  | 1.617399181  |
| 49 | C49 | 3.845086272 | 3.863664152  | 0.333763985  |
| 50 | C50 | 4.930702226 | 4.75796312   | 0.336634345  |

|     |      |             |              |              |
|-----|------|-------------|--------------|--------------|
| 51  | H51  | 5.848789876 | 4.522752078  | 0.399687069  |
| 52  | C52  | 4.426099824 | 6.03255343   | 0.227098722  |
| 53  | H53  | 4.929132227 | 6.83856773   | 0.210398706  |
| 54  | C54  | 3.023023686 | 5.913112731  | 0.148214052  |
| 55  | C55  | 2.079397415 | 6.926644888  | 0.09231966   |
| 56  | C56  | 0.711624052 | 6.58237056   | 0.129773528  |
| 57  | C57  | 0.404003461 | 7.44686374   | 0.034381531  |
| 58  | H58  | 0.384980071 | 8.395782752  | -0.018878193 |
| 59  | C59  | 1.520392068 | 6.651164832  | 0.034674478  |
| 60  | H60  | 2.424345241 | 6.944931851  | -0.025142538 |
| 61  | C61  | 1.077532145 | 5.311639063  | 0.14029041   |
| 62  | N62  | 2.698817563 | 4.546485758  | 0.203479235  |
| 63  | N63  | 0.270935997 | 5.295102695  | 0.232007722  |
| 64  | B64  | 1.224751309 | 4.058752222  | 0.220540042  |
| 65  | F65  | 0.940375811 | 3.331988793  | -0.937319634 |
| 66  | F66  | 1.043459964 | 3.270705574  | 1.337759584  |
| 67  | C67  | 2.522895415 | 8.321641355  | -0.110562275 |
| 68  | C68  | 2.533853924 | 9.243429131  | 0.929238082  |
| 69  | C69  | 2.982462711 | 10.52825128  | 0.678925685  |
| 70  | H70  | 3.006825588 | 11.14993444  | 1.395806581  |
| 71  | C71  | 3.401022258 | 10.94235     | -0.578631462 |
| 72  | C72  | 3.344893911 | 10.01579804  | -1.616385135 |
| 73  | H73  | 3.610132708 | 10.28359319  | -2.489446664 |
| 74  | C74  | 2.907833354 | 8.716938372  | -1.413546954 |
| 75  | C75  | 2.098636548 | 8.88000842   | 2.348327051  |
| 76  | H76  | 2.132168381 | 9.678036893  | 2.915103473  |
| 77  | H77  | 2.702366612 | 8.196541092  | 2.709526645  |
| 78  | H78  | 1.182955038 | 8.529344666  | 2.329377908  |
| 79  | C79  | 3.893066076 | 12.34636614  | -0.775992162 |
| 80  | H80  | 3.943695073 | 12.54395451  | -1.735070078 |
| 81  | H81  | 4.78220733  | 12.44100292  | -0.375132233 |
| 82  | H82  | 3.273829964 | 12.97311603  | -0.346368893 |
| 83  | C83  | 2.907634776 | 7.766186132  | -2.596312534 |
| 84  | H84  | 3.521399695 | 7.02345426   | -2.418487052 |
| 85  | H85  | 3.197599589 | 8.245546746  | -3.400303215 |
| 86  | H86  | 2.00172763  | 7.417313878  | -2.734105833 |
| 87  | C87  | 2.005073601 | 4.152736919  | 0.080226625  |
| 88  | C88  | 1.917580716 | 3.009619889  | 0.869796476  |
| 89  | H89  | 1.17384883  | 2.899332581  | 1.448653705  |
| 90  | C90  | 2.894612286 | 2.030822284  | 0.829331257  |
| 91  | H91  | 2.801171113 | 1.248430702  | 1.358643093  |
| 92  | C92  | 4.011059153 | 2.186400911  | 0.023483779  |
| 93  | C93  | 4.091303156 | 3.310472467  | -0.822345295 |
| 94  | H94  | 4.821870972 | 3.411098398  | -1.419323604 |
| 95  | C95  | 3.095692983 | 4.252162888  | -0.769524478 |
| 96  | H96  | 3.157732815 | 5.008694971  | -1.342264123 |
| 97  | C97  | 5.187458469 | 1.337891612  | 0.04619664   |
| 98  | C98  | 6.505332729 | 1.842936312  | -0.052251872 |
| 99  | H99  | 6.740390042 | 2.760678745  | -0.148839283 |
| 100 | C100 | 7.390045813 | 0.803070721  | 0.014163368  |
| 101 | H101 | 8.337600785 | 0.862883074  | -0.008408248 |
| 102 | C102 | 6.628173883 | -0.372917592 | 0.119684316  |
| 103 | C103 | 7.033983409 | -1.687827168 | 0.100361524  |
| 104 | C104 | 6.109912204 | -2.723867499 | 0.050537516  |
| 105 | C105 | 6.307233105 | -4.109799958 | -0.114116127 |
| 106 | H106 | 7.143535533 | -4.557303803 | -0.158892376 |
| 107 | C107 | 5.081467363 | -4.681808953 | -0.195956758 |
| 108 | H108 | 4.910059305 | -5.609525283 | -0.307462778 |
| 109 | C109 | 4.096509645 | -3.662847605 | -0.087279191 |
| 110 | N110 | 5.27049935  | -0.013791942 | 0.137945262  |
| 111 | N111 | 4.739402324 | -2.477833773 | 0.052781739  |
| 112 | B112 | 4.123418658 | -1.065928503 | 0.316498128  |
| 113 | F113 | 3.113534803 | -0.792724113 | -0.59467507  |
| 114 | F114 | 3.670110091 | -0.993080361 | 1.625677471  |
| 115 | C115 | 8.510535933 | -1.974847913 | -0.004018633 |
| 116 | C116 | 9.255329566 | -2.07850619  | 1.20046314   |
| 117 | C117 | 0.635316073 | -2.298704006 | 1.080913025  |
| 118 | H118 | 1.150173194 | -2.383363737 | 1.873605662  |
| 119 | C119 | 1.270227833 | -2.397435781 | -0.120767979 |
| 120 | C120 | 0.503684885 | -2.2804714   | -1.266127811 |
| 121 | H121 | 0.930448564 | -2.333032795 | -2.112514629 |
| 122 | C122 | 9.12003479  | -2.086910459 | -1.219776993 |
| 123 | C123 | 8.594346623 | -1.925053311 | 2.53266339   |
| 124 | H124 | 7.8939179   | -2.602472571 | 2.627697596  |
| 125 | H125 | 9.260102049 | -2.042849176 | 3.242412382  |
| 126 | H126 | 8.199335205 | -1.031798572 | 2.60110361   |
| 127 | C127 | 2.75122523  | -2.620427651 | -0.203165443 |
| 128 | H128 | 2.937025557 | -3.58208804  | -0.183046026 |

|     |      |    |             |              |              |
|-----|------|----|-------------|--------------|--------------|
| 129 | H129 | -1 | 3.095024479 | -2.238040265 | -1.038144297 |
| 130 | H130 | -1 | 3.189579346 | -2.186661727 | 0.558680512  |
| 131 | C131 | -  | 8.367182318 | -1.966360077 | -2.545501026 |
| 132 | H132 | -  | 7.850465172 | -1.133819488 | -2.553233265 |
| 133 | H133 | -  | 9.007401609 | -1.959873647 | -3.285825663 |
| 134 | H134 | -  | 7.757685357 | -2.727619613 | -2.645749179 |
| 135 | C135 | -  | 2.638831049 | -3.878490224 | -0.165218741 |
| 136 | C136 | -  | 1.690387722 | -3.167537389 | 0.570360434  |
| 137 | H137 | -  | 1.963769627 | -2.427807187 | 1.100340971  |
| 138 | C138 | -  | 0.372216896 | -3.523530503 | 0.538875263  |
| 139 | H139 | -  | 0.257277342 | -3.023879472 | 1.045265256  |
| 140 | C140 | -  | 0.070473304 | -4.609222871 | -0.221896652 |
| 141 | C141 | -  | 0.874573481 | -5.280459663 | -0.990974804 |
| 142 | H142 | -  | 0.591442875 | -5.999571835 | -1.543932805 |
| 143 | C143 | -  | 2.216041613 | -4.932045131 | -0.972214021 |
| 144 | H144 | -  | 2.84203234  | -5.407174181 | -1.506257686 |

## Geometries (Z matrices) of 2

|    |     |              |              |              |
|----|-----|--------------|--------------|--------------|
| 1  | B1  | 2.611648729  | 3.304987706  | 0.053345381  |
| 2  | F2  | 2.203923037  | 2.867334673  | 1.314176154  |
| 3  | F3  | 2.085270388  | 2.527098257  | -0.965329287 |
| 4  | B4  | -4.125596609 | 0.556383895  | 0.385864703  |
| 5  | F5  | -3.599283938 | 0.482025742  | -0.902663194 |
| 6  | F6  | -3.144042914 | 0.420879974  | 1.356812897  |
| 7  | B7  | 1.666694344  | -3.867393212 | -0.00780843  |
| 8  | F8  | 1.364507924  | -3.231320394 | 1.193888295  |
| 9  | F9  | 1.402729797  | -3.065483731 | -1.109308083 |
| 10 | N10 | 4.183773693  | 3.285756197  | 0.038934251  |
| 11 | N11 | 2.170124819  | 4.793604095  | -0.191513866 |
| 12 | N12 | -4.866269886 | 1.928222296  | 0.557894166  |
| 13 | N13 | -5.211052727 | -0.56068531  | 0.565710427  |
| 14 | N14 | 0.841526899  | -5.194562777 | -0.164127475 |
| 15 | N15 | 3.181009261  | -4.276394591 | 0.041040163  |
| 16 | C16 | 4.976355742  | 2.227820035  | 0.351754906  |
| 17 | C17 | 6.304711352  | 2.683012693  | 0.555644264  |
| 18 | H18 | 7.136657343  | 2.04538764   | 0.816041153  |
| 19 | C19 | 6.31207575   | 4.048813132  | 0.352476862  |
| 20 | H20 | 7.153287947  | 4.722335118  | 0.430675305  |
| 21 | C21 | 4.982323641  | 4.429643562  | 0.03467046   |
| 22 | C22 | 4.439015922  | 5.704012165  | -0.186175952 |
| 23 | C23 | 3.053276517  | 5.86342192   | -0.338087957 |
| 24 | C24 | 2.310916012  | 7.006087787  | -0.734678178 |
| 25 | H25 | 2.72678251   | 7.982933394  | -0.935359612 |
| 26 | C26 | 0.990635801  | 6.617185555  | -0.833461765 |
| 27 | H27 | 0.140788282  | 7.219371889  | -1.11772676  |
| 28 | C28 | 0.920651508  | 5.241532158  | -0.485977741 |
| 29 | C29 | -0.333419822 | 4.47749307   | -0.380892132 |
| 30 | C30 | -1.324059169 | 4.650549083  | -1.373720367 |
| 31 | O31 | -1.05343276  | 5.335168546  | -2.534234579 |
| 32 | C32 | -0.207079184 | 4.63802177   | -3.456314918 |
| 33 | H33 | 0.686647957  | 4.237533632  | -2.96505525  |
| 34 | H34 | 0.084259319  | 5.366507625  | -4.216355703 |
| 35 | H35 | -0.75143298  | 3.811517783  | -3.93156857  |
| 36 | C36 | -2.623245855 | 4.167414081  | -1.171964227 |
| 37 | O37 | -3.591322418 | 4.423141353  | -2.112029017 |
| 38 | C38 | -3.844952879 | 3.342154241  | -3.017714553 |
| 39 | H39 | -3.958784778 | 2.391916765  | -2.485004873 |
| 40 | H40 | -3.030567098 | 3.249334902  | -3.748262928 |
| 41 | H41 | -4.771021202 | 3.592052893  | -3.540720661 |
| 42 | C42 | -2.944916519 | 3.462018864  | 0.004402223  |
| 43 | C43 | -1.926693081 | 3.190925879  | 0.930591728  |
| 44 | H44 | -2.156623609 | 2.609206578  | 1.814998845  |
| 45 | C45 | -0.645518574 | 3.69893654   | 0.746489409  |
| 46 | H46 | 0.118091298  | 3.520689724  | 1.492338831  |
| 47 | C47 | -4.360120659 | 3.156609016  | 0.291677335  |
| 48 | C48 | -5.394943322 | 4.120964934  | 0.388224885  |
| 49 | H49 | -5.263467973 | 5.17914891   | 0.213922342  |
| 50 | C50 | -6.552963206 | 3.452325612  | 0.736516222  |
| 51 | H51 | -7.537276823 | 3.87231768   | 0.886420583  |
| 52 | C52 | -6.225356181 | 2.074101419  | 0.835028976  |
| 53 | C53 | -7.061552257 | 0.962554283  | 1.023554103  |
| 54 | C54 | -6.551989626 | -0.336970759 | 0.880325575  |
| 55 | C55 | -7.20624306  | -1.595389278 | 0.948217238  |
| 56 | H56 | -8.2453211   | -1.74803594  | 1.201872888  |
| 57 | C57 | -6.266674797 | -2.558481893 | 0.633287018  |
| 58 | H58 | -6.40425108  | -3.628686812 | 0.573016986  |
| 59 | C59 | -5.033765625 | -1.894115039 | 0.415455487  |

|     |      |              |              |              |
|-----|------|--------------|--------------|--------------|
| 60  | C60  | -3.75101232  | -2.570144107 | 0.131906204  |
| 61  | C61  | -3.642227604 | -3.362583596 | -1.026499555 |
| 62  | O62  | -4.661344241 | -3.372484233 | -1.947463701 |
| 63  | C63  | -4.586118926 | -2.331045323 | -2.928798    |
| 64  | H64  | -4.405937227 | -1.355921393 | -2.462889719 |
| 65  | H65  | -5.548782431 | -2.327068875 | -3.445239508 |
| 66  | H66  | -3.788395552 | -2.53725581  | -3.65351368  |
| 67  | C67  | -2.517738439 | -4.174969088 | -1.223798278 |
| 68  | O68  | -2.446573764 | -4.935052842 | -2.36645716  |
| 69  | C69  | -1.450148607 | -4.513168913 | -3.306157928 |
| 70  | H70  | -0.476996179 | -4.362269329 | -2.826953388 |
| 71  | H71  | -1.75184792  | -3.577930059 | -3.795445883 |
| 72  | H72  | -1.377727295 | -5.3076787   | -4.052177587 |
| 73  | C73  | -1.505128986 | -4.241997663 | -0.241112885 |
| 74  | C74  | -1.588580569 | -3.38645133  | 0.868855293  |
| 75  | H75  | -0.797424283 | -3.399811356 | 1.60630059   |
| 76  | C76  | -2.689653441 | -2.555983966 | 1.047416123  |
| 77  | H77  | -2.749266818 | -1.916504095 | 1.919687359  |
| 78  | C78  | -0.499369677 | -5.315544652 | -0.338970572 |
| 79  | C79  | -0.81803197  | -6.681160408 | -0.563913554 |
| 80  | H80  | -1.817584297 | -7.056739286 | -0.72568508  |
| 81  | C81  | 0.358981664  | -7.399250475 | -0.504514759 |
| 82  | H82  | 0.484717983  | -8.468071543 | -0.601257152 |
| 83  | C83  | 1.404637163  | -6.466348467 | -0.280605841 |
| 84  | C84  | 2.787849801  | -6.672929695 | -0.182812026 |
| 85  | C85  | 3.655636579  | -5.586959747 | -0.003279733 |
| 86  | C86  | 5.062772674  | -5.55816585  | 0.183137947  |
| 87  | H87  | 5.713370131  | -6.420804425 | 0.167796047  |
| 88  | C88  | 5.417188441  | -4.238341473 | 0.382045685  |
| 89  | H89  | 6.402437485  | -3.834509835 | 0.564575396  |
| 90  | C90  | 4.236029076  | -3.458480469 | 0.277869467  |
| 91  | C91  | 4.194914404  | -1.98662354  | 0.364439279  |
| 92  | C92  | 4.788300789  | -1.361264387 | 1.481282471  |
| 93  | O93  | 5.23471604   | -2.110014334 | 2.542362103  |
| 94  | C94  | 4.20359968   | -2.575351315 | 3.422778167  |
| 95  | H95  | 3.358246196  | -2.994697893 | 2.866559588  |
| 96  | H96  | 3.84077164   | -1.757538636 | 4.059193521  |
| 97  | H97  | 4.658611941  | -3.346115343 | 4.048862187  |
| 98  | C98  | 4.967549178  | 0.027443066  | 1.503334388  |
| 99  | O99  | 5.582972663  | 0.601710339  | 2.587950649  |
| 100 | C100 | 4.701366956  | 1.298133571  | 3.479298451  |
| 101 | H101 | 4.018904313  | 1.961556426  | 2.937252025  |
| 102 | H102 | 5.339168754  | 1.883169437  | 4.145672103  |
| 103 | H103 | 4.112059097  | 0.586607363  | 4.072182594  |
| 104 | C104 | 4.559632559  | 0.816311562  | 0.406048995  |
| 105 | C105 | 3.888493139  | 0.194075876  | -0.658441077 |
| 106 | H106 | 3.535789578  | 0.796405194  | -1.485632571 |
| 107 | C107 | 3.708749228  | -1.184683949 | -0.679139994 |
| 108 | H108 | 3.217068705  | -1.652854514 | -1.522526209 |
| 109 | C109 | 5.332849004  | 6.886287088  | -0.264162301 |
| 110 | C110 | 5.102383372  | 8.011715172  | 0.545376537  |
| 111 | H111 | 4.270761661  | 8.001972124  | 1.243419897  |
| 112 | C112 | 5.946987488  | 9.118806109  | 0.476531614  |
| 113 | H113 | 5.762352712  | 9.976207578  | 1.117900065  |
| 114 | C114 | 7.02739531   | 9.124271291  | -0.407866559 |
| 115 | H115 | 7.683112924  | 9.989038374  | -0.462747189 |
| 116 | C116 | 7.261332132  | 8.014494092  | -1.222063107 |
| 117 | H117 | 8.095150827  | 8.014989402  | -1.918922645 |
| 118 | C118 | 6.424630851  | 6.901941837  | -1.148855755 |
| 119 | H119 | 6.600426625  | 6.045515272  | -1.792687684 |
| 120 | C120 | -8.498558012 | 1.172106047  | 1.334244345  |
| 121 | C121 | -9.501898242 | 0.611025336  | 0.526298118  |
| 122 | H122 | -9.220163031 | 0.031694316  | -0.347691144 |
| 123 | C123 | -10.84830964 | 0.819062965  | 0.822364236  |
| 124 | H124 | -11.61197809 | 0.387773497  | 0.180953081  |
| 125 | C125 | -11.2138885  | 1.582245315  | 1.9327094    |
| 126 | H126 | -12.26361268 | 1.740503635  | 2.164417169  |
| 127 | C127 | -10.22482054 | 2.143544047  | 2.742838957  |
| 128 | H128 | -10.5013105  | 2.734544108  | 3.611755582  |
| 129 | C129 | -8.877444564 | 1.945689106  | 2.444478646  |
| 130 | H130 | -8.109424583 | 2.372901318  | 3.082197469  |
| 131 | C131 | 3.337218872  | -8.052689982 | -0.264979668 |
| 132 | C132 | 3.146105434  | -8.830650024 | -1.418524566 |
| 133 | H133 | 2.604965012  | -8.411421769 | -2.26151681  |
| 134 | C134 | 3.667509512  | -10.12187238 | -1.494758969 |
| 135 | H135 | 3.521117616  | -10.70773795 | -2.39820053  |
| 136 | C136 | 4.377561645  | -10.6581846  | -0.419086223 |
| 137 | H137 | 4.77994773   | -11.66574432 | -0.479280583 |

|     |      |             |              |             |
|-----|------|-------------|--------------|-------------|
| 138 | C138 | 4.567814217 | -9.894770307 | 0.734044224 |
| 139 | H139 | 5.112753389 | -10.30756562 | 1.578671836 |
| 140 | C140 | 4.055706509 | -8.599876093 | 0.810383616 |
| 141 | H141 | 4.193597229 | -8.011828257 | 1.712944097 |

### 13. Electrostatic potential surface of **1**, **2**, and tetramethyl-BODIPY

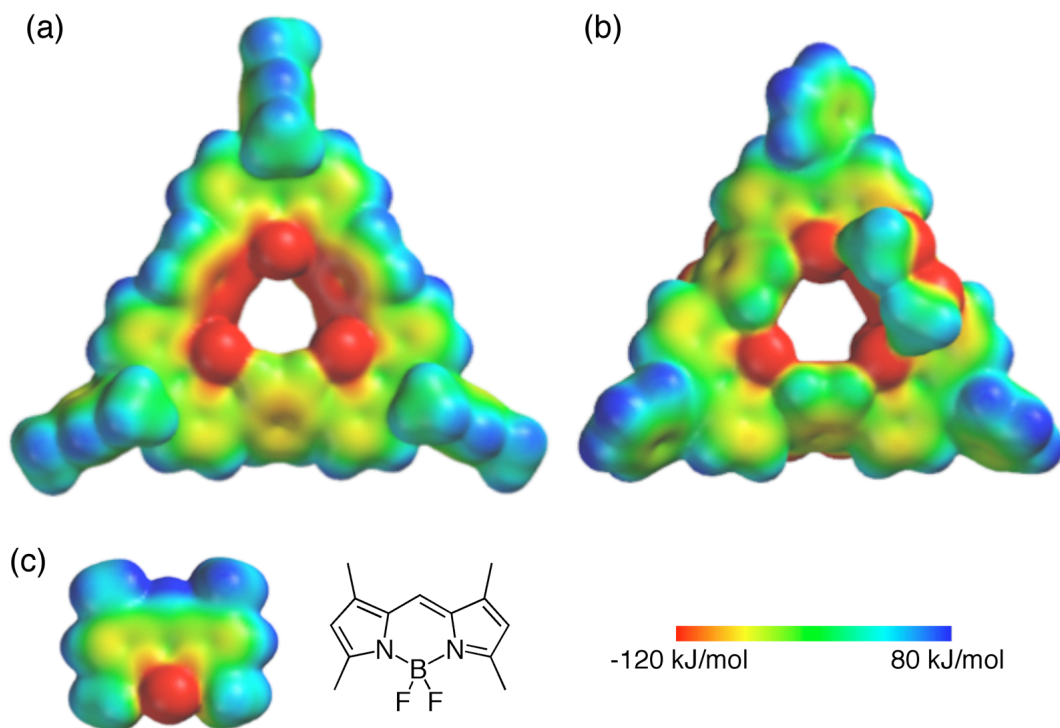

**Figure S11.** Electrostatic potential surfaces of (a) **1**, (b) **2** and (c) tetramethyl-BODIPY by DFT calculation at the B3LYP/6-31G\* level.

## 14. NMR spectra of 1 and 2

### <sup>1</sup>H NMR spectrum of 1

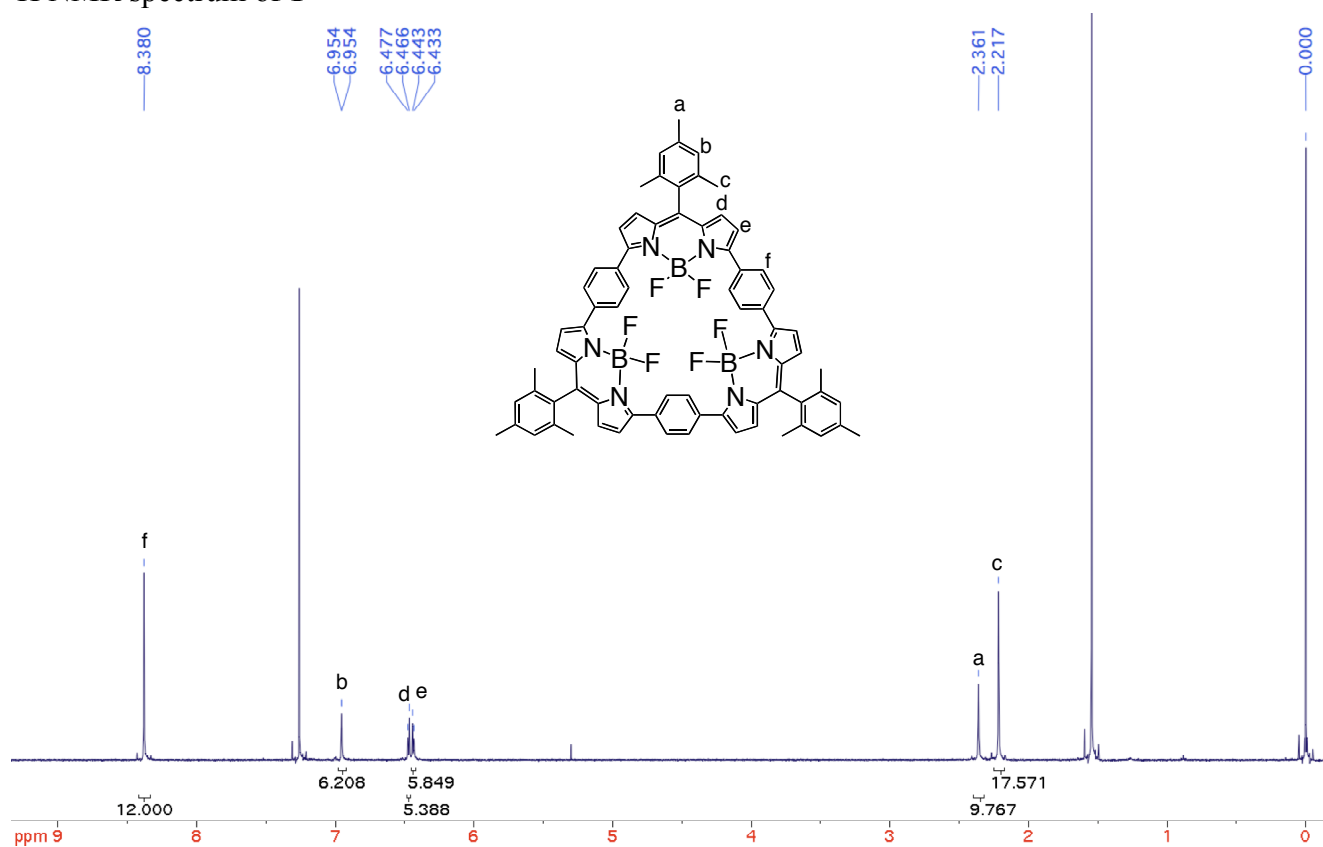

### <sup>13</sup>C NMR spectrum of 1

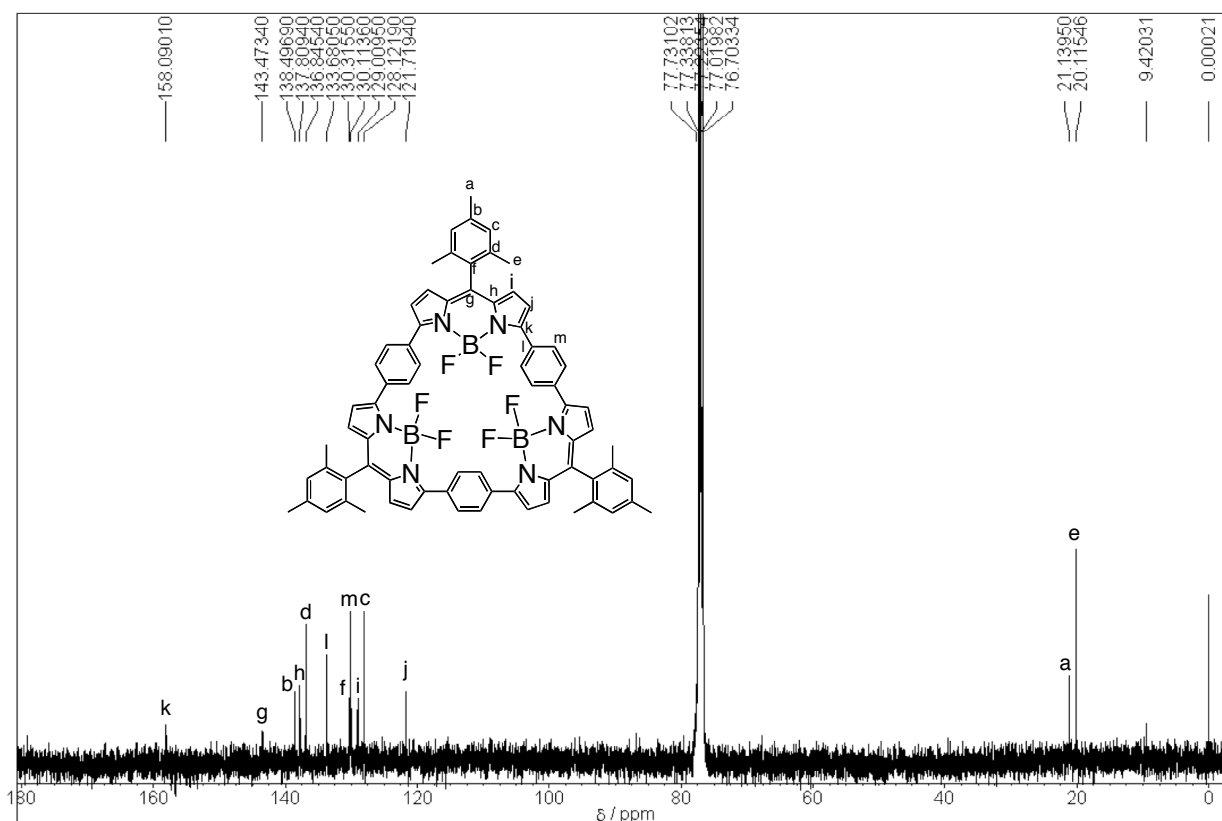



### $^1\text{H}$ NMR spectrum of **2**

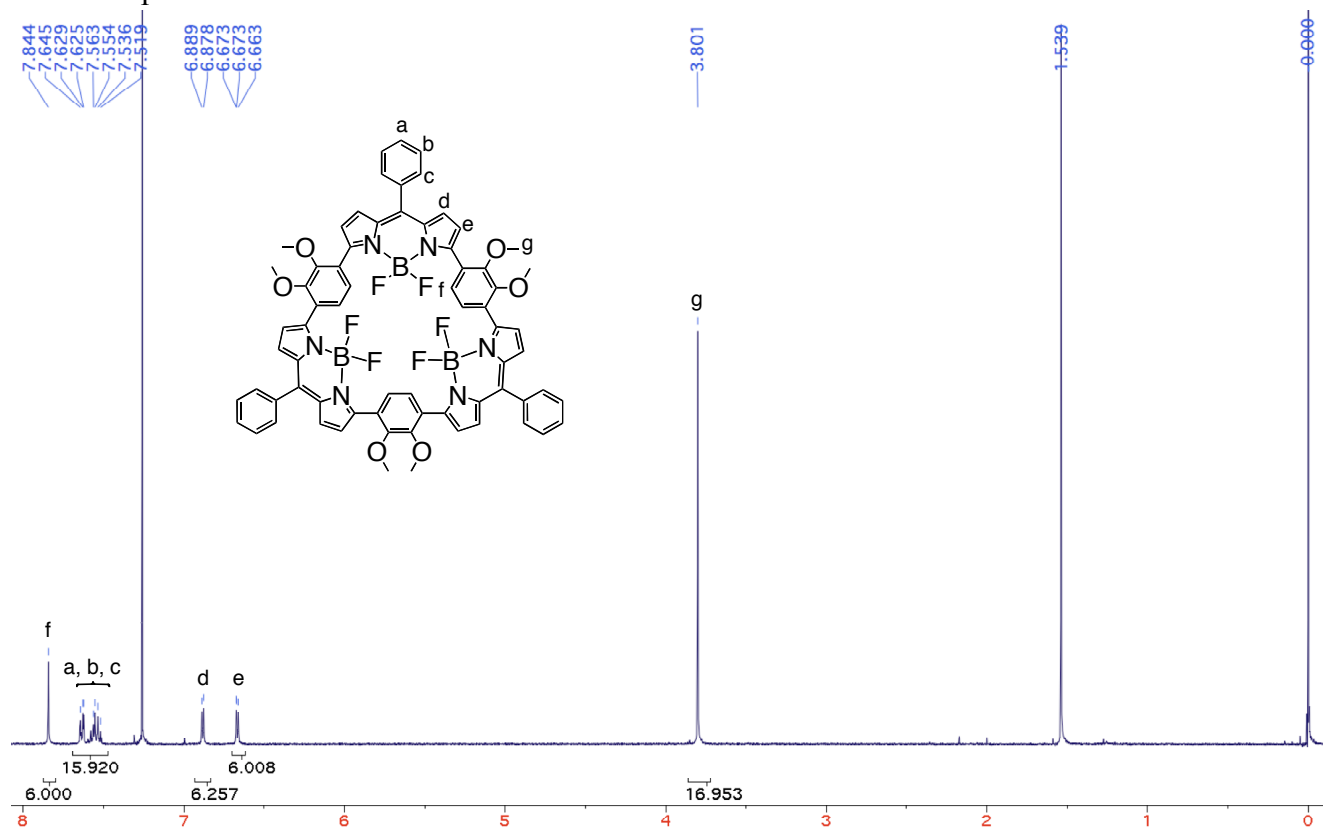

### $^{13}\text{C}$ NMR spectrum of **2**

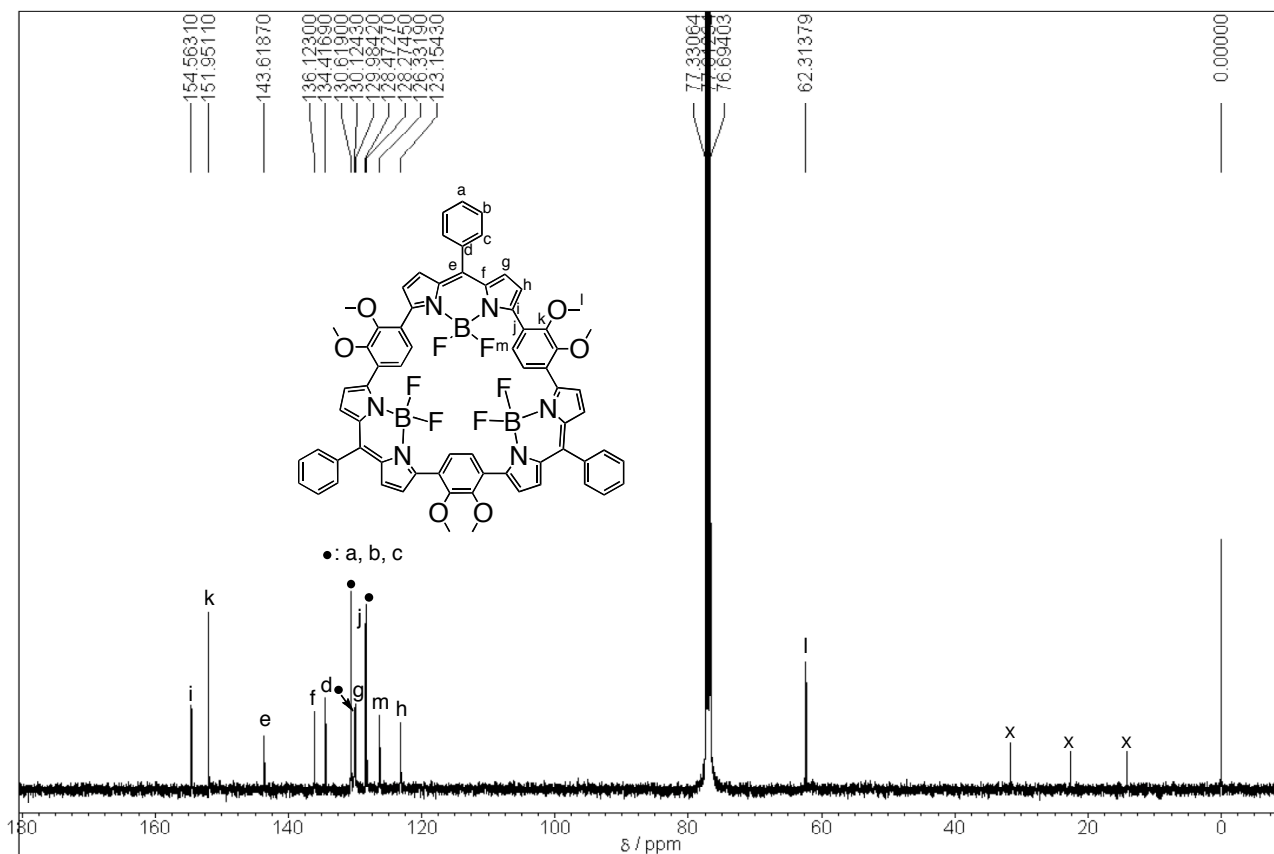

**Reference**

- 1 Spartan08 for Windows; Wavefunction, Inc.: Irvine, CA.
